# Supplementary material for: Short and stereoselective synthesis of C-glycosylated glycine derivatives from glycals by radical addition and reduction
Source: Royal Society of Chemistry journal article supplement (doi:10.1039/b410120k), 2004-01-01
Supplement: b410120k.doc [file b410120k.doc]

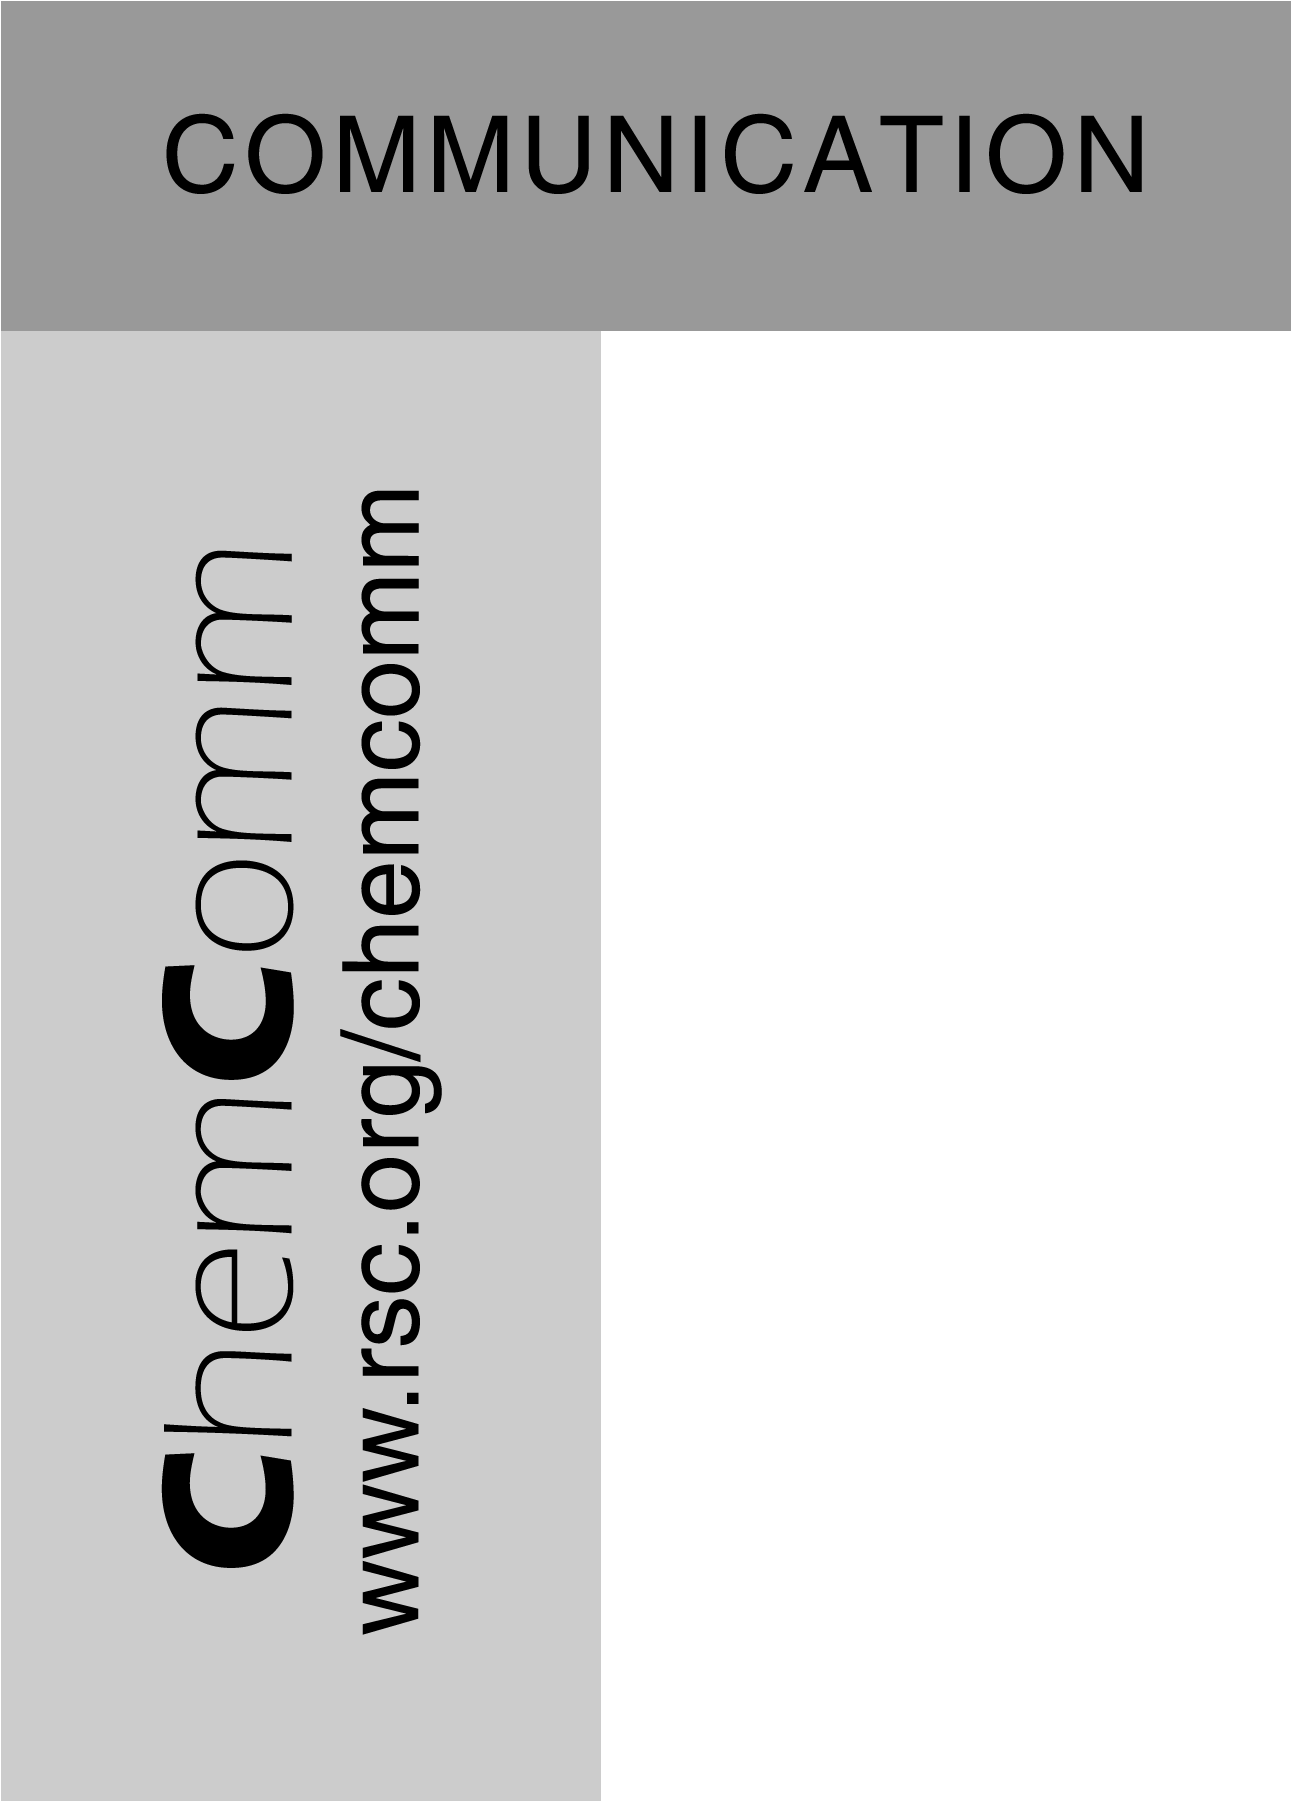
Short and stereoselective synthesis of *C* glycosylated glycine derivatives from glycals by radical addition and reduction

Thomas Sommermann,aBoo Geun Kim,a Karl Peters,b Eva-Maria Petersb and Torsten Linker*a

aDepartment of Chemistry, University of Potsdam, Karl-Liebknecht-Str. 24-25, D-14476 Potsdam, Germany. Fax: 49 331 9775056; Tel: 49 331 9775212; E-mail: [linker@chem.uni-potsdam.de](mailto:linker@chem.uni-potsdam.de)

b Max-Planck-Institut für Festkörperforschung, D-70506 Stuttgart, Germany.

Fax: 49 7152 332240; Tel: 49 7152 47511; E-mail: karlpeters@gmx.net

# Supporting Information

## Experimental Procedures

Oxime ester **3**:

To a solution of 2.45 g (5.64 mmol) of carbohydrate **2**6b in a mixture of 12.5 mL of absolute methanol and 15 mL of dioxan were added slowly 3.30 g (28.2 mmol) of isoamyl nitrite at 0 °C. After 30 min at this temperature, a solution of 425 mg (7.87 mmol) of sodium methoxide in 5.0 mL of absolute Methanol was added within 15 min. The solution was kept at room temperature for 24 h and then concentrated under reduced pressure. The residue was acetylated with a mixture of 30 mL of pyridine and 15 mL of acetic anhydride within 12 h and concentrated in vacuum. Silica gel column chromatography (petroleum ether / ethyl acetate 60 : 40) afforded 2.37 g (94 %) of the oxime ester **3** (Rf = 0.30) as a colorless oil, []D20 = - 52.8 (*c* 1.09, CHCl3). 1H NMR (600 MHz, CDCl3)  1.92, 2.02, 2.10, 2.27 (4 s, each 3 H, OAc, NOAc), 3.44 (s, 3 H, OMe), 3.79 (ddd, *J* = 10.0, 4.4, 2.3 Hz, 1 H, 5-H), 3.84 (dd, *J* = 11.1, 9.0, 1 H, 2-H), 3.88 (s, 3 H, CO2Me), 4.14 (dd, *J* = 12.3, 2.3 Hz, 1 H, 6-H), 4.34 (dd, *J* = 12.3, 4.4 Hz, 1 H, 6´-H), 5.07 (dd, *J* = 10.0, 9.0 Hz, 1 H, 4-H), 5.11 (d, *J* = 9.0 Hz, 1 H, 1-H), 5.54 (dd, *J* = 11.1, 9.0 Hz, 1 H, 3-H). 13C NMR (151 MHz, CDCl3)  19.7, 20.7, 20.9, 21.0 (4 q, OAc, NOAc), 46.8 (2 d, C-2), 53.5 (q, CO2Me), 57.6 (q, OMe), 62.3 (t, C-6), 69.1, 71.1, 72.4 (3 d, C-3, C-4, C-5), 101.3 (d, C-1), 152.8 (s, C-7), 162.7, 167.2, 169.9, 170.1, 170.9 (5 s, OAc, CO2Me). Anal. Calcd for C18H25NO11: C, 48.32; H, 5.63; N, 3.13. Found: C, 48.36; H, 5.69; N, 2.93.

Glycine derivatives *gluco-***6**:

To a solution of 1.60 g (3.58 mmol) of oxime ester **3** in 60 mL of diethyl ether were added 193 mg (7.16 mmol) of amalgamated aluminium foil. After efficient stirring for 2.5 h at room temperature the solvent was removed, and the residue was acetylated with a mixture of 40 mL of pyridine and 20 mL of acetic anhydride within 12 h and concentrated in vacuum. Silica gel column chromatography (ethyl acetate) afforded 1.03 g (67 %) of the S-isomer **6** (Rf = 0.34) and 253 mg (17 %) of the R-isomer **6** (Rf = 0.27) as white crystals.

(*S*)-**6**:1H NMR (500 MHz, CDCl3)  1.95, 1.99, 2.06, 2.07 (4 s, each 3 H, OAc, NAc), 2.48 (ddd, *J* = 11.4, 9.0, 0.9 Hz, 1 H, 2-H), 3.57 (ddd, *J* = 9.9, 4.7, 2.4 Hz, 1 H, 5-H), 3.61 (s, 3 H, OMe), 3.74 (s, 3 H, CO2Me), 4.09 (dd, *J* = 12.3, 2.4 Hz, 1 H, 6-H), 4.26 (d, *J* = 9.0 Hz, 1 H, 1-H), 4.28 (dd, *J* = 12.3, 4.7 Hz, 1 H, 6´-H), 5.01 (dd, *J* = 9.9, 9.3 Hz, 1 H, 4-H), 5.11 (dd, *J* = 8.6, 0.9 Hz, 1 H, 7-H), 5.18 (dd, *J* = 11.4, 9.3 Hz, 1 H, 3-H), 6.29 (d, *J* = 8.6 Hz, 1 H, N-H). 13C NMR (125 MHz, CDCl3)  20.9, 21.0, 21.1, 23.7 (4 q, OAc, NAc), 49.0, 49.7 (2 d, C-2, C-7), 53.1 (q, CO2Me), 58.1 (q, OMe), 62.5 (t, C-6), 69.8, 70.4, 71.7 (3 d, C-3, C-4, C-5), 102.0 (d, C-1), 170.1, 170.8, 171.1, 171.4, 172.3 (5 s, OAc, CO2Me). Mp 160-161 °C, []D20 = + 98.4 (*c* 0.98, CHCl3). Anal. Calcd for C18H27NO11: C, 49.88; H, 6.28; N, 3.23. Found: C, 50.04; H, 6.33; N, 3.24.

(*R*)-**6**: 1H NMR (500 MHz, CDCl3)  1.97, 2.01, 2.05, 2.06 (4 s, each 3 H, OAc, NAc), 2.57 (ddd, *J* = 11.2, 9.1, 2.4 Hz, 1 H, 2-H), 3.42 (s, 3 H, OMe), 3.63 (ddd, *J* = 10.3, 4.5, 2.2 Hz, 1 H, 5-H), 3.71 (s, 3 H, CO2Me), 4.09 (dd, *J* = 12.2, 2.2 Hz, 1 H, 6-H), 4.26 (d, *J* = 9.0 Hz, 1 H, 1-H), 4.28 (dd, *J* = 12.2, 4.5 Hz, 1 H, 6´-H), 4.96 (dd, *J* = 10.3, 9.4 Hz, 1 H, 4-H), 4.98 (dd, *J* = 11.2, 9.4 Hz, 1 H, 3-H), 5.01 (dd, *J* = 9.4, 2.4 Hz, 1 H, 7-H), 6.29 (d, *J* = 9.1 Hz, 1 H, N-H). 13C NMR (125 MHz, CDCl3)  21.1, 21.2, 21.6, 23.2 (4 q, OAc, NAc), 47.9, 48.0 (2 d, C-2, C-7), 52.7 (q, CO2Me), 57.3 (q, OMe), 62.2 (t, C-6), 70.0, 70.1, 71.6 (3 d, C-3, C-4, C-5), 101.2 (d, C-1), 170.1, 170.2, 170.8, 170.9, 172.1 (5 s, OAc, CO2Me). Mp 116-117 °C, []D20 = - 27.0 (*c* 1.12, CHCl3). Anal. Calcd for C18H27NO11: C, 49.88; H, 6.28; N, 3.23. Found: C, 49.86; H, 6.37; N, 3.20.

**Crystal data for *gluco*-(*S*)-6**

C18H27NO11, Bruker AXS P4 diffractometer, monoclinic, *P21*, *a* = 1028.7(2), *b* = 1073.4(2), *c* = 1061.4(2) pm,  = 107.24(2)°, V = 1119.4(3)x106 pm3, *d*calcd = 1.286 gcm-3, 2max = 55°, *Z* = 2, MoK radiation,  = 71.073 pm, -scan,  = 0.11 mm-1, *T* = 293 K, structure solved by direct methods, 5944 measured reflections, 5107 unique reflections, of which 4792 had *F*>3(*F*), *F*0/parameter ratio = 17.55 *R* = 0.072, *Rw* = 0.069, refined versus *F*. Residual electron density of the difference-Fourier map: max = 0.79, min = -0.67 eÅ-3. Program: SHELXTL-PLUS.
